# Supplementary material
Source: PubMed Central journal article supplement (PMC8145781)
Supplement: NIHMS1700934-supplement-supplemental_figure.pdf [file NIHMS1700934-supplement-supplemental_figure.pdf]

## Supplemental Online Content

Ahmad F, Anderson RN. The leading causes of death in the US for 2020. *JAMA*. doi:10.1001/jama.2021.5469

**eFigure.** Number of Deaths by MMWR Week—United States, 2015-2020

This supplemental material has been provided by the authors to give readers additional information about their work.

**eFigure.** Number of Deaths by MMWR Week—United States, 2015-2020

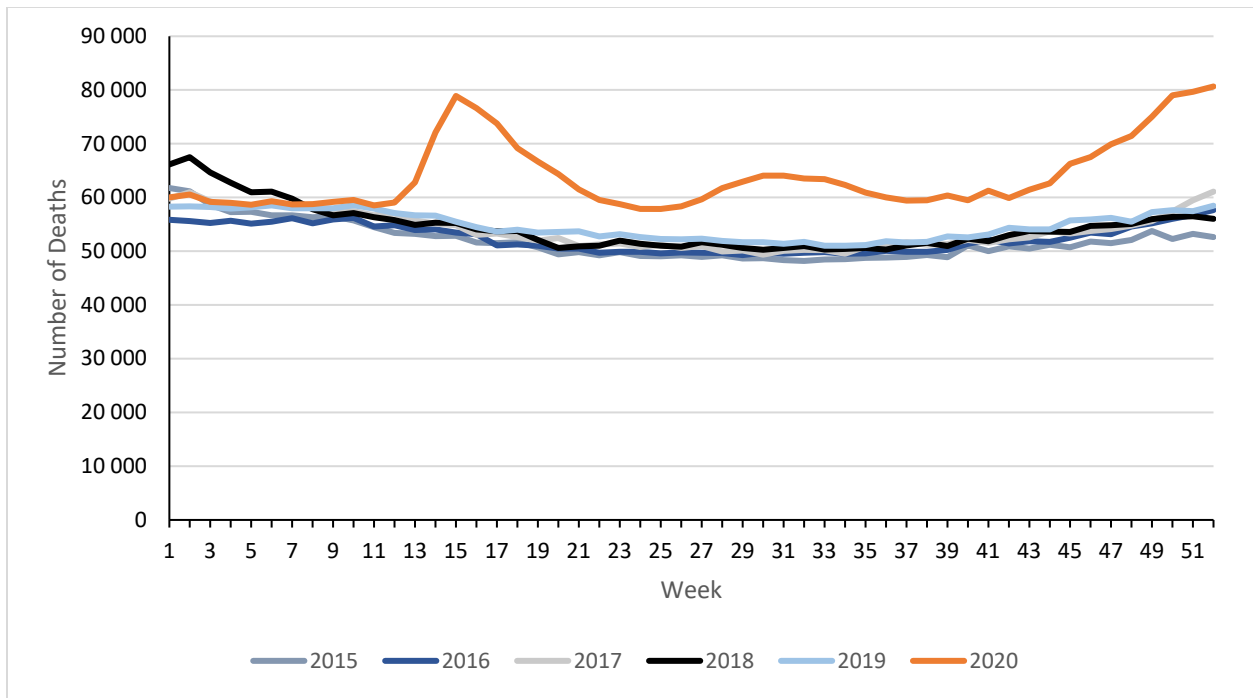

Source: National Center for Health Statistics. National Vital Statistics System. Data for 2015-2019 are final. Data for 2020 are provisional.
